# Supplementary material
Source: publisher figshare collection journal article supplement (https://adisjournals.figshare.com/ndownloader/files/34682524)
Supplement: Supplementary file 1 [file 34682524]

Chlormethine Gel for the Treatment of Skin Lesions in All Stages of Mycosis Fungoides Cutaneous T-Cell Lymphoma: A Narrative Review and International Experience

Larisa J. Geskin, Martine Bagot, Emilia Hodak, Ellen J. Kim

Chlormethine gel is a treatment purposely developed to treat mycosis fungoides (MF), and it is endorsed by international guidelines for patients with MF skin lesions\*

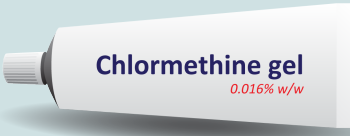

But the development of skin reactions (e.g., dermatitis) at the sites of application may complicate its usage

Real-world experience

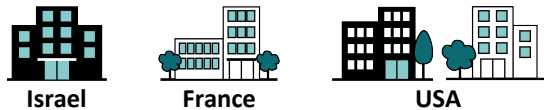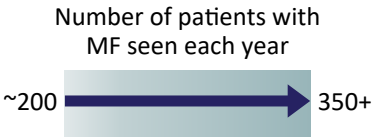

Data from four clinics demonstrate the efficacy of chlormethine gel in routine practice

Chlormethine gel usage

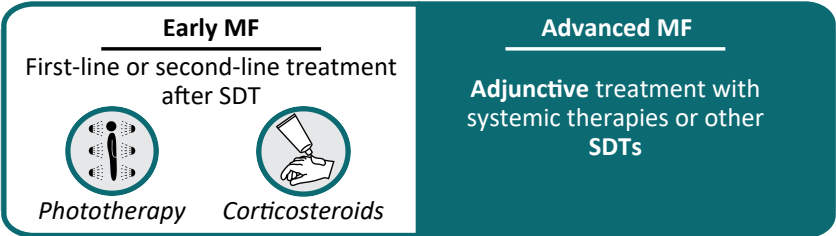

Application frequency

Initial dose 1-3× per week\*\*  
(frequency can be increased up to daily dosage)  
Option to alternate with topical steroids

Response time

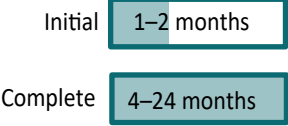

Incidence of dermatitis

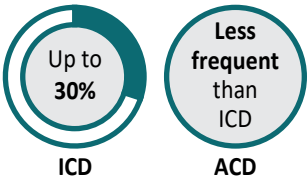

Management of CL gel dermatitis (options to consider)

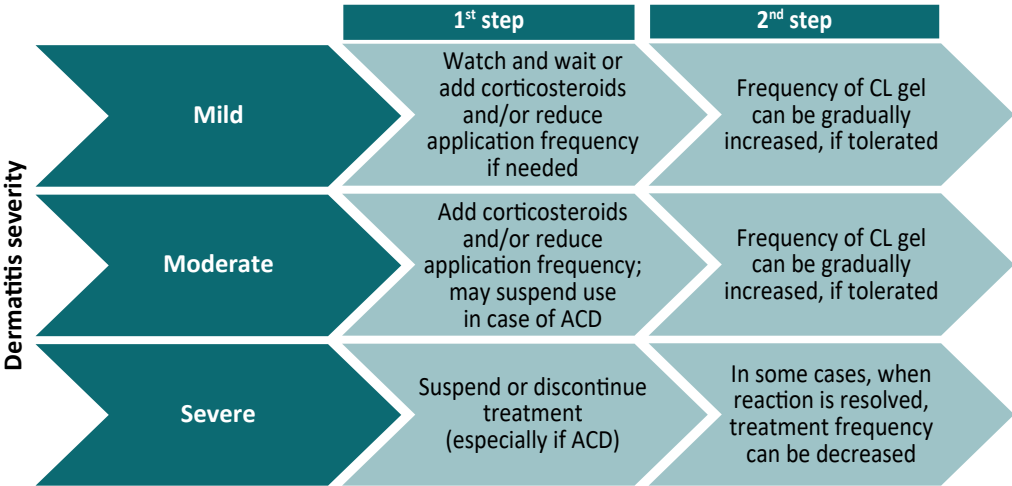

Emergent adverse reactions can generally be managed by adjusting chlormethine gel dose or using topical steroids

Treatment stop/frequency adjustment is allowed in case of any grade of skin ulceration or blistering, or moderately severe or severe dermatitis. \* In US and ISR, CL gel label is limited to IA-IB. \*\*The chlormethine gel label indicates daily application. ACD allergic contact dermatitis; ICD irritant contact dermatitis; MF mycosis fungoides; SDT skin-directed therapy
